# Supplementary material for: Association of National Expansion of Insurance Coverage of Medically Tailored Meals With Estimated Hospitalizations and Health Care Expenditures in the US
Source: PubMed Central journal article supplement (PMC9577678; doi:10.1001/jamanetworkopen.2022.36898), 2022-10-17
Supplement: jamanetwopen-e2236898-s001.pdf [file jamanetwopen-e2236898-s001.pdf]

## Supplementary Online Content

Hager K, Cudhea FP, Wong JB, et al. Association of national expansion of insurance coverage of medically tailored meals with estimated hospitalizations and health care expenditures in the US. *JAMA Netw Open*. 2022;5(10):e2236898. doi:10.1001/jamanetworkopen.2022.36898

**eFigure.** Net Annual Policy Costs by Percentile of Effect Size for Reductions in Health Care Expenditures Associated With Medically Tailored Meal Receipt

**eTable 1.** Weighted Average of the Observation Period and MTM Intervention Lengths in Previous Studies

**eTable 2.** Meta-analysis of Previous Studies That Assessed the Impact of MTM Receipt on Inpatient Hospitalizations

**eTable 3.** Meta-analysis of Previous Studies That Assessed the Impact of MTM Receipt on Health Care Expenditures

**eTable 4.** Per Capita, 1-Year Estimated Averted Hospitalizations, Savings in Health Care Expenditures, and Net Policy Cost Savings Attributable to Provision of MTMs, by Eligible Population

**eTable 5.** Ten-Year Savings in Health Care Expenditures Attributable to MTM Receipt, by Discounting Approach

### eReferences

This supplementary material has been provided by the authors to give readers additional information about their work.

**eFigure. Net Annual Policy Costs by Percentile of Effect Size for Reductions in Health Care Expenditures Associated With Medically Tailored Meal Receipt**

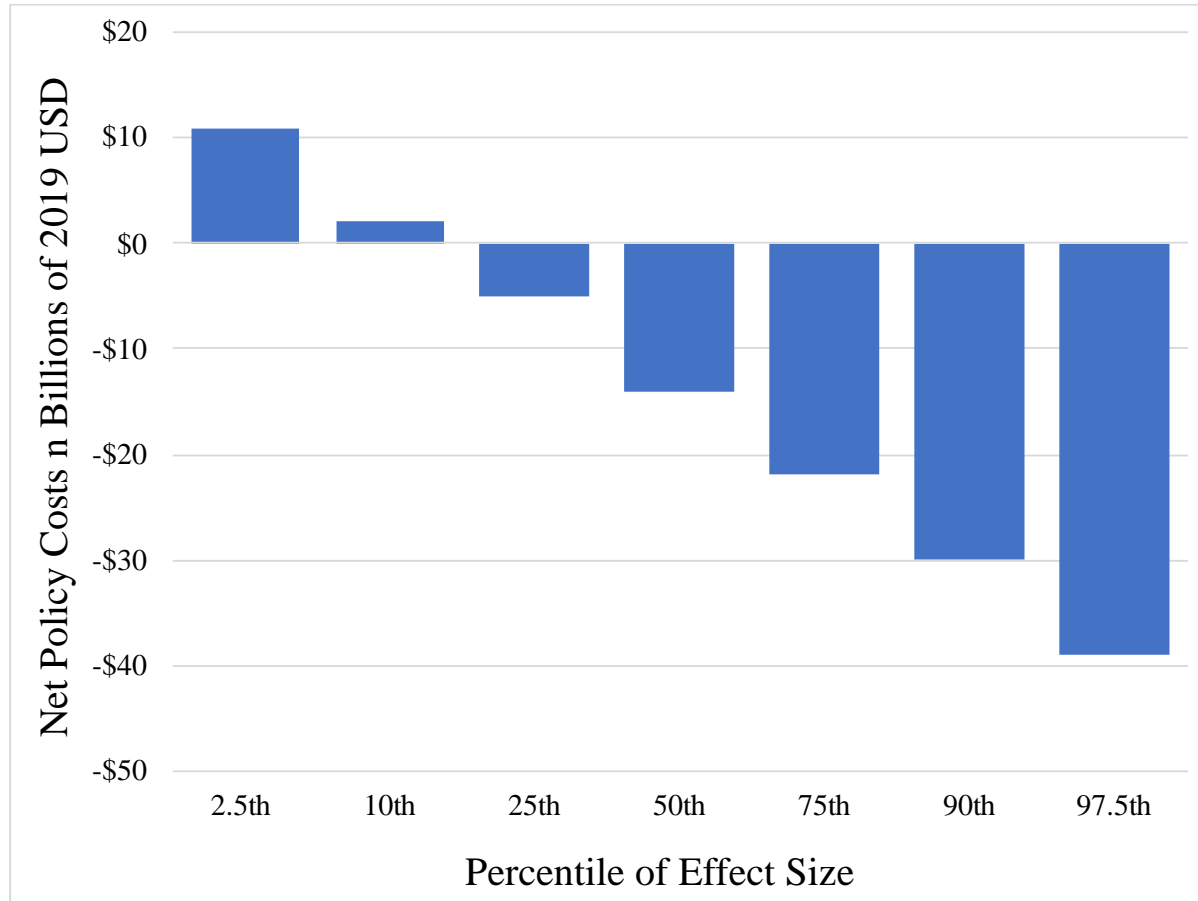

Percentiles are equivalent to the following one-year change in healthcare expenditures associated with eight months MTM receipt: 2.5<sup>th</sup> = -6.9%; 10<sup>th</sup> = -11.4%; 25<sup>th</sup> = -15.3%; 50<sup>th</sup> = -19.7% (central estimate); 75<sup>th</sup> = -24.1%; 90<sup>th</sup> = -28.0%; 97.5<sup>th</sup> = -32.4%. Healthcare expenditures would need to be reduced by 12.6% for the policy to be cost neutral, equivalent to the 14<sup>th</sup> percentile of the effect size uncertainty range for change in healthcare costs associated with MTM receipt. Effect size estimates are from an original metaanalysis of all known studies assessing the association between MTM receipt and inpatient hospitalizations and/or healthcare expenditures conducted in the U.S. in the past 20 years.

**eTable 1. Weighted Average of the Observation Period and MTM Intervention Lengths in Previous Studies**

| <b>Study</b>                    | <b>Number of MTM recipients in the intervention group</b> | <b>Observation Period</b> | <b>MTM Intervention Length</b> |
|---------------------------------|-----------------------------------------------------------|---------------------------|--------------------------------|
| <b>Berkowitz 1</b> <sup>1</sup> | 499                                                       | 21.4 months               | 12.4 months                    |
| <b>Berkowitz 2</b> <sup>2</sup> | 133                                                       | 19.1 months               | 17.8 months                    |
| <b>Gurvey</b> <sup>3</sup>      | 65                                                        | 6.0 months                | 6.0 months                     |
| <b>Hummel</b> <sup>4</sup>      | 33                                                        | 3.0 months                | 1.0 month                      |
| <b>Weighted Average</b>         | <b>730</b>                                                | <b>18.8 months</b>        | <b>12.2 months</b>             |

The weighted average observation time and MTM intervention length included all known studies assessing the association between MTM receipt and inpatient hospitalizations and/or healthcare expenditures conducted in the U.S. in the past 20 years. The study by Horton<sup>5</sup> did not specify the average observation period nor intervention length.

**eTable 2. Meta-analysis of Previous Studies That Assessed the Impact of MTM Receipt on Inpatient Hospitalizations**

| <b>Study</b>             | <b>Relative Risk of Inpatient Hospitalization Associated with MTM receipt</b> | <b>Standard Error</b> |
|--------------------------|-------------------------------------------------------------------------------|-----------------------|
| Berkowitz 1 <sup>1</sup> | 0.51                                                                          | 0.16                  |
| Berkowitz 2 <sup>2</sup> | 0.48                                                                          | 0.16                  |
| Hummel <sup>4</sup>      | 0.68                                                                          | 0.19                  |
| Gurvey <sup>3</sup>      | 0.51                                                                          | 0.13                  |
| <b>Pooled Effect</b>     | <b>0.53</b>                                                                   | <b>0.08</b>           |

Results from inverse variance meta-analysis with random effects that included all known studies assessing the association between MTM receipt and inpatient hospitalizations and/or healthcare expenditure in the U.S. in the past 20 years. Only one study<sup>2</sup> reported the impact of MTMs on emergency department admissions (in a second study,<sup>3</sup> the authors stated that their results for emergency department admissions were “inconclusive”). Therefore, we did not incorporate MTM impacts on emergency department admissions in our analysis as they would have been dependent on a single study.

**eTable 3. Meta-analysis of Previous Studies That Assessed the Impact of MTM Receipt on Health Care Expenditures**

| <b>Study</b>             | <b>Percent Change in Annual Healthcare Expenditures Associated with MTM receipt</b> | <b>Standard Error</b> |
|--------------------------|-------------------------------------------------------------------------------------|-----------------------|
| Berkowitz 1 <sup>1</sup> | -17.0%                                                                              | 5.3%                  |
| Berkowitz 2 <sup>2</sup> | -16.0%                                                                              | 5.7%                  |
| Horton <sup>5</sup>      | -24.0%                                                                              | 8.3%                  |
| Gurvey <sup>3</sup>      | -31.0%                                                                              | 9.0%                  |
| <b>Pooled Effect</b>     | <b>-19.7%</b>                                                                       | <b>6.5%</b>           |

Results from inverse variance meta-analysis with random effects that included all known studies assessing the association between MTM receipt and inpatient hospitalizations and/or healthcare expenditure in the U.S. in the past 20 years.

**eTable 4. Per Capita, 1-Year Estimated Averted Hospitalizations, Savings in Health Care Expenditures, and Net Policy Cost Savings Attributable to Provision of MTMs, by Eligible Population**

| <b>Insurance</b>                                                                                                  | <b>Population Size</b> | <b>Per Capita Averted Inpatient Hospitalizations (95% UI)</b> | <b>Per Capita Savings in Healthcare Expenditures (95% UI)</b> | <b>Per Capita Net Policy Cost Savings</b> |
|-------------------------------------------------------------------------------------------------------------------|------------------------|---------------------------------------------------------------|---------------------------------------------------------------|-------------------------------------------|
| <i>Primary Population: Non-institutionalized US adults with nutrition sensitive disease, and IADL limitations</i> |                        |                                                               |                                                               |                                           |
| Private                                                                                                           | 1,485,365              | 0.19 (0.12, 0.28)                                             | \$5,920 (1,800, 10,560)                                       | \$2,090 (-1,960, 6,390)                   |
| Medicare                                                                                                          | 2,571,562              | 0.28 (0.18, 0.40)                                             | \$5,250 (1,710, 8,820)                                        | \$1,320 (-2,110, 4,710)                   |
| Medicaid                                                                                                          | 697,292                | 0.28 (0.15, 0.47)                                             | \$6,310 (2,150, 11,470)                                       | \$2,490 (-1,600, 7,270)                   |
| Dual eligible                                                                                                     | 1,555,779              | 0.26 (0.15, 0.37)                                             | \$7,460 (2,570, 13,300)                                       | \$3,770 (-1,200, 9,100)                   |
| <b>Total</b>                                                                                                      | <b>6,309,998</b>       | <b>0.25 (0.15, 0.37)</b>                                      | <b>\$6,090 (3,940, 8,540)</b>                                 | <b>\$2,230 (50, 4,530)</b>                |
| <i>Non-institutionalized US adults with nutrition sensitive disease, IADL limitations, and food insecurity</i>    |                        |                                                               |                                                               |                                           |
| Private                                                                                                           | 330,587                | 0.23 (0.11, 0.38)                                             | \$7,860 (1,490, 17,380)                                       | \$4,168 (-1,280, 10,170)                  |
| Medicare                                                                                                          | 587,828                | 0.28 (0.15, 0.46)                                             | \$5,100 (1,700, 9,350)                                        | \$4,160 (-1,380, 10,400)                  |
| Medicaid                                                                                                          | 286,066                | 0.41 (0.26, 0.60)                                             | \$9,440 (2,090, 20,270)                                       | \$1,290 (-640, 3,860)                     |
| Dual eligible                                                                                                     | 683,200                | 0.21 (0.11, 0.33)                                             | \$6,290 (2,050, 11,790)                                       | \$2,410 (-230, 5,790)                     |
| <b>Total</b>                                                                                                      | <b>1,887,681</b>       | <b>0.27 (0.14, 0.42)</b>                                      | <b>\$6,670 (4,180, 10,010)</b>                                | <b>\$3,090 (690, 5,602)</b>               |

| <i>Non-institutionalized US adults with diabetes and IADL limitations</i>                 |                  |                          |                               |                               |
|-------------------------------------------------------------------------------------------|------------------|--------------------------|-------------------------------|-------------------------------|
| Private                                                                                   | <b>636,320</b>   | 0.19 (0.10, 0.29)        | \$6,740 (1,880, 12,370)       | \$3,770 (-1,050, 9,580)       |
| Medicare                                                                                  | <b>1,001,345</b> | 0.30 (0.18, 0.46)        | \$5,560 (1,870, 9,480)        | \$2,580 (-1,200, 6,450)       |
| Medicaid                                                                                  | <b>368,460</b>   | 0.17 (0.07, 0.33)        | \$6,660 (\$1,960, \$12,550)   | \$3,700 (-910, 9,560)         |
| Dual eligible                                                                             | <b>824,381</b>   | 0.26 (0.15, 0.40)        | \$8,550 (2,770, 14,990)       | \$5,580 (-160, 12,140)        |
| <b>Total</b>                                                                              | <b>2,830,506</b> | <b>0.25 (0.19, 0.32)</b> | <b>\$6,838 (4,330, 9,650)</b> | <b>\$3,870 (1,290, 6,660)</b> |
| <i>Non-institutionalized US adults with congestive heart failure and IADL limitations</i> |                  |                          |                               |                               |
| Private                                                                                   | 374,445          | 0.21 (0.08, 0.34)        | \$6,650 (1,904, 12,120)       | \$3,680 (-1,130, 8,970)       |
| Medicare                                                                                  | 871,058          | 0.33 (0.19, 0.50)        | \$5,780 (1,970, 10,010)       | \$2,800 (-931, 7,010)         |
| Medicaid                                                                                  | 119,035          | 0.31 (0.20, 0.48)        | \$6,080 (1,450, 12,300)       | \$3,110 (-1,534, 9,280)       |
| Dual eligible                                                                             | 330,745          | 0.38 (0.21, 0.59)        | \$7,950 (2,400, 15,040)       | \$4,970 (-470, 11,970)        |
| <b>Total</b>                                                                              | <b>1,695,293</b> | <b>0.31 (0.22, 0.42)</b> | <b>\$6,420 (3,770, 9,210)</b> | <b>\$3,443 (-770, 6,238)</b>  |

Estimates are the mean of 1,000 Monte Carlo simulations with the 95% uncertainty interval defined as the 2.5<sup>th</sup> percentile to the 97.5<sup>th</sup> percentile of the simulations. The policy simulation model runs 1,000 Monte Carlo simulations using inputs and their uncertainties from 2019 Medical Expenditure Panel Survey, relative risks of annual hospitalizations and annual percent change in healthcare expenditures associated MTM receipt, screening costs and meal costs.

**eTable 5. Ten-Year Savings in Health Care Expenditures Attributable to MTM Receipt, by Discounting Approach**

| <b>Insurance</b> | <i>No Discounting of Future Costs</i><br><b>10-Year Savings in Healthcare Expenditures in Billions of 2019 USD</b><br>(95% UI) | <i>3% Discounting of Future Costs (primary analysis)</i><br><b>10-Year Savings in Healthcare Expenditures in Billions of 2019 USD</b><br>(95% UI) | <i>5% Discounting of Future Costs</i><br><b>10-Year Savings in Healthcare Expenditures in Billions of 2019 USD</b><br>(95% UI) |
|------------------|--------------------------------------------------------------------------------------------------------------------------------|---------------------------------------------------------------------------------------------------------------------------------------------------|--------------------------------------------------------------------------------------------------------------------------------|
| Private          | \$125.9 (38.2, 220.8)                                                                                                          | \$109.2 (33.3, 191.7)                                                                                                                             | \$99.6 (30.2, 174.7)                                                                                                           |
| Medicare         | \$168.7 (56.0, 285.6)                                                                                                          | \$146.9 (48.7, 248.6)                                                                                                                             | \$134.3 (44.5, 227.0)                                                                                                          |
| Medicaid         | \$64.2 (20.9, 114.8)                                                                                                           | \$55.8 (18.2, 99.7)                                                                                                                               | \$50.7 (16.6, 90.8)                                                                                                            |
| Dual eligible    | \$199.6 (67.2, 346.8)                                                                                                          | \$172.6 (58.1, 299.9)                                                                                                                             | \$156.8 (52.8, 272.5)                                                                                                          |
| <b>Total</b>     | <b>\$558.4 (357.3, 782.1)</b>                                                                                                  | <b>\$484.5 (310.2, 678.4)</b>                                                                                                                     | <b>\$441.2 (282.7, 617.7)</b>                                                                                                  |

In each of the ten years, the eligible population was assumed to receive 8 months of medically tailored meals per year. This table reports potential savings in healthcare expenditures only and does not report the net policy costs. Estimates are the mean of 1,000 Monte Carlo simulations with the 95% uncertainty interval defined as the 2.5<sup>th</sup> percentile to the 97.5<sup>th</sup> percentile of the simulations. The policy simulation model runs 1,000 Monte Carlo simulations using inputs and their uncertainties from 2019 Medical Expenditure Panel Survey, relative risks of annual hospitalizations and annual percent change in healthcare expenditures MTM receipt, screening costs and meal costs. The policy simulation model was run separately and then summed for each of the ten years (2019-2028) to obtain final estimates. Baseline distributions of hospitalizations and healthcare expenditures for years 2020-2028 were estimated using the historical rate of change in population size and healthcare expenditures from 2010-2019 for the target population. Healthcare expenditures are rounded to the nearest \$100,000,000.



## eReferences

1. Berkowitz SA, Terranova J, Randall L, Cranston K, Waters DB, Hsu J. Association between receipt of a medically tailored meal program and health care use. *JAMA Intern Med*. 2019;179(6):786-793. Medline:31009050 doi:10.1001/jamainternmed.2019.0198
2. Berkowitz SA, Terranova J, Hill C, et al. Meal delivery programs reduce the use of costly health care in dually eligible Medicare and Medicaid beneficiaries. *Health Aff (Millwood)*. 2018;37(4):535-542. Medline:29608345 doi:10.1377/hlthaff.2017.0999
3. Gurvey J, Rand K, Daugherty S, Dinger C, Schmeling J, Lavery N. Examining health care costs among MANNA clients and a comparison group. *J Prim Care Community Health*. 2013;4(4):311-317. Medline:23799677 doi:10.1177/2150131913490737
4. Hummel SL, Karmally W, Gillespie BW, et al. Home-delivered meals postdischarge from heart failure hospitalization. *Circ Heart Fail*. 2018;11(8):e004886. Medline:30354562 doi:10.1161/CIRCHEARTFAILURE.117.004886
5. Horton R, Paulson K, Aaron D, Raab R, Hardy RY, Pulling E. Medically tailored meals reduce medical costs for chronically ill. 2018. Accessed September 15, 2022. <https://www.projectangelheart.org/food-is-medicine/research-policy/small-intervention-big-impact/>
